# Supplementary material for: The Effect of Oil-Rich Food Waste Substrates, Used as an Alternative Carbon Source, on the Cultivation of Microalgae—A Pilot Study
Source: MDPI journal article supplement (doi:10.3390/microorganisms11071621), 2023-06-21
Supplement: s1 [file s1]

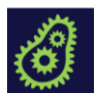

## Supplementary Materials

# The Effect of Oil-Rich Food Waste Substrates, Used as an Alternative Carbon Source, on the Cultivation of Microalgae—A Pilot Study

Pavína Sniegoňová, Martin Szotkowski, Jiří Holub, Pavína Sikorová and Ivana Márová \*

Faculty of Chemistry, Brno University of Technology, 61200 Brno, Czech Republic

\* Correspondence: marova@fch.vut.cz

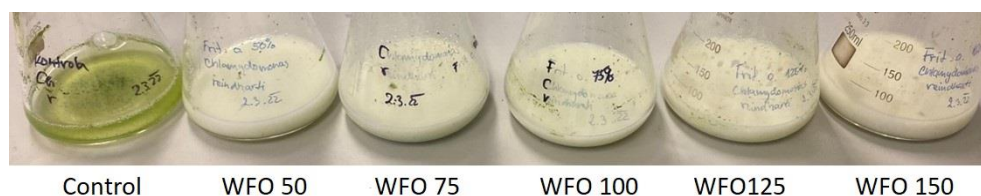

**Figure S1.** Cultivation of microalgae *Chlamydomonas reinhardtii* on waste frying oil.
